# Supplementary material
Source: publisher figshare collection journal article supplement (https://microbiology.figshare.com/articles/dataset/_/12423875)

**Supplementary figure 1.** Coverage distribution for long contigs (>10kb). Number of contigs for assembly at k-mer size 77. (*median Coverage* = 21,6, marked by green line). Yellow lines represent *medianCoverage* times 0,7 and 1,3. Each bar represents all edges with a coverage in a bin of size 1. Blue bars represent long contigs not containing an ESBL gene (**a**) or plasmid replicon (**b**). Orange bars represent long contigs containing an ESBL gene or plasmid replicon.

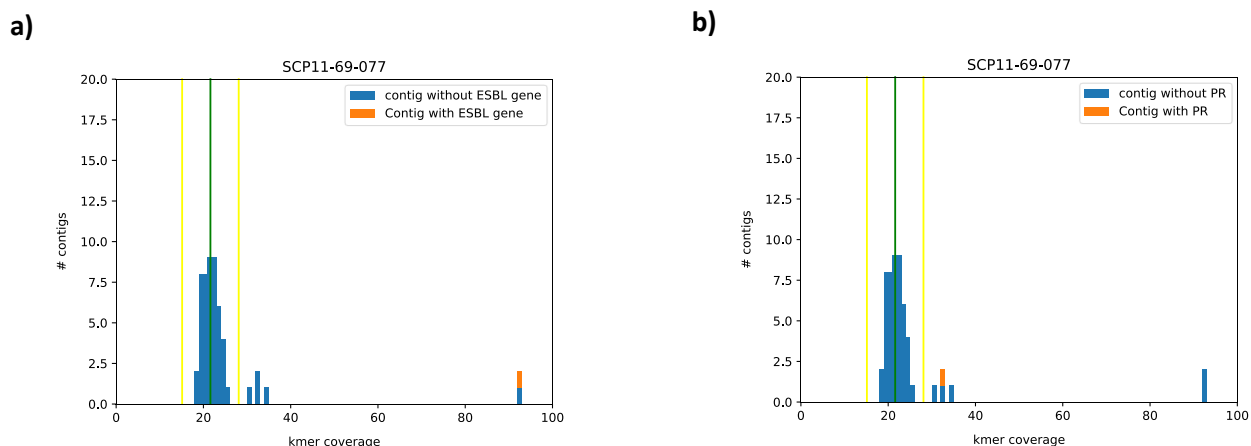

**Supplementary figure 2.** Assembly graph before chromosomal removal where the coverage of the plasmid replicon- and ESBL gene -containing contigs did not deviate from the median coverage of all long edges (>10kb) but were included in the plasmid assembly.

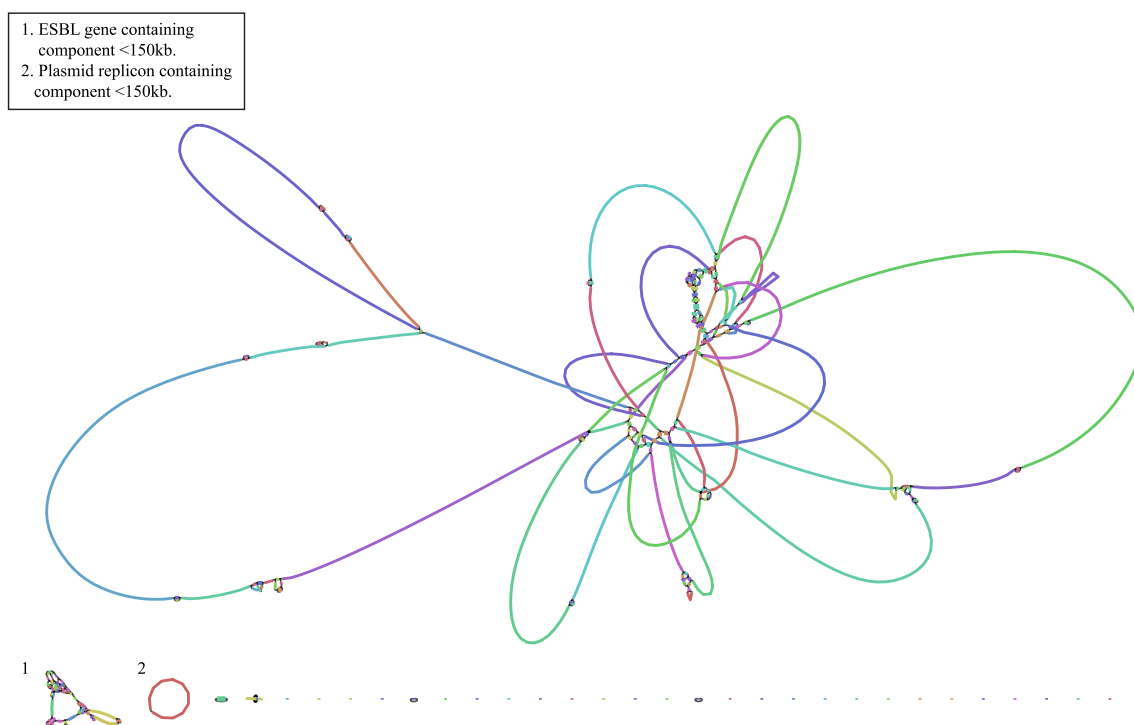

Supplement: Supplementary file 1 [file 1]
