# Supplementary material
Source: publisher figshare collection journal article supplement (https://microbiology.figshare.com/articles/dataset/_/12423875)
Supplement: Supplementary file 2 [file 1]

Archive with 3 entries (3 files):
- script_median_coverage.py
- Supplementary figures 1 2 revision version 2.pdf
- Supplementary tables 1 2 3 4 5 6 revision version 2.xlsx
